# Supplementary material for: The Effect of Money Priming on Self-Focus in the Imitation-Inhibition Task
Source: Atypon-hosted journal article supplement (doi:10.1027/1618-3169/a000466), 2019-11-01
Supplement: 1618-3169_a000466_esm1.pdf [file 1618-3169_a000466_esm1.pdf]

Doi: 10.1027/1618-3169/a000466

Supplemental Material for

**The effect of money priming on self-focus in the imitation-inhibition task:**

**A registered report**

Oliver Genschow

(University of Cologne, Germany)

Johannes Schuler

(Fraunhofer Institute for System and Innovation Research, Germany)

Emiel Cracco

(Ghent University, Belgium)

Marcel Brass

(Ghent University, Belgium)

Michaela Wänke

(University of Mannheim, Germany)

Author Note

Correspondence concerning this article should be addressed to Oliver Genschow, University of Cologne, Social Cognition Center Cologne, Richard-Strauss Str. 2, 50931 Köln, Germany, E-Mail: [oliver.genschow@uni-koeln.de](mailto:oliver.genschow@uni-koeln.de)

**This PDF file includes**

Additional tables

Additional analyses

References

**Table***Table 1.* Overview of manipulations related to self-other focus that have been previously used in research on the imitation-inhibition task.

| Reference                           | Type of manipulation                                                                                                                             |
|-------------------------------------|--------------------------------------------------------------------------------------------------------------------------------------------------|
| Cook & Bird (2011)                  | Scrambled-sentence task: pro-social vs. anti-social                                                                                              |
| Cook & Bird (2012)                  | Scrambled-sentence task: pro-social vs. anti-social                                                                                              |
| Hogeveen & Obhi (2011)              | Word priming task: independent vs. interdependent                                                                                                |
| Leighton et al. (2010)              | Scrambled-sentence task: pro-social vs. control vs. anti-social <sup>6</sup>                                                                     |
| Spengler et al. (2010; Study 1)     | Mirror manipulation: mirror vs. turned mirror                                                                                                    |
| Spengler et al. (2010; Study 2)     | Self-referential task: evaluative task (answering questions related to the self) vs. memory retrieval task (answering trivial pursuit questions) |
| Wang & Hamilton (2013, Study 1 & 2) | Scrambled-sentence task: pro-social vs. control vs. anti-social                                                                                  |
| Wang & Hamilton (2013, Study 3)     | Presentation of cartoon videos: pro-social (helping) vs. anti-social (hindering)                                                                 |
| Wang & Hamilton (2015)              | Scrambled-sentence task: pro-social vs. anti-social                                                                                              |

## Additional analyses

### Pilot Study

**Latencies.** Additional t-tests indicated that the congruency effect was significantly larger than zero in both, the money priming condition,  $t(41) = 8.23, p < .001$ , as well as the control condition,  $t(41) = 11.38, p < .001$ .

### Preregistered Experiment

**Latencies.** Additional non-preregistered explorative t-tests indicated that the congruency effect was significantly larger than zero in both, the money priming condition,  $t(146) = 18.92, p < .001$ , as well as the control condition,  $t(146) = 19.77, p < .001$ .

**Interference and Facilitation.** An additional explorative non-preregistered 2 (effect: facilitation vs. interference) x 2 (priming: money vs. control) ANOVA on the latencies yielded neither a significant main effect for priming,  $F(1, 146) = 2.24, p = .137$ , nor a significant interaction between effect and priming,  $F(1, 146) = 0.37, p = .542$ .

An additional explorative non-preregistered 2 (effect: facilitation vs. interference) 2 (priming: money vs. control) ANOVA on the error rates yielded neither a significant main effect for priming,  $F(1, 146) = 1.89, p = .172$ , nor a significant interaction between effect and priming,  $F(1, 146) = 2.46, p = .119$ .

### References

- Cook, J., & Bird, G. (2011). Social attitudes differentially modulate imitation in adolescents and adults. *Experimental Brain Research*, *211*, 601-612.
- Cook, J. L., & Bird, G. (2012). Atypical social modulation of imitation in autism spectrum conditions. *Journal of autism and developmental disorders*, *42*, 1045-1051.
- Hogeveen, J., & Obhi, S. S. (2011). Altogether now: activating interdependent self-construal induces hypermotor resonance. *Cognitive neuroscience*, *2*, 74-82.
- Leighton, J., Bird, G., Orsini, C., & Heyes, C. (2010). Social attitudes modulate automatic imitation. *Journal of Experimental Social Psychology*, *46*, 905-910.
- Spengler, S., Brass, M., Kühn, S., & Schütz-Bosbach, S. (2010). Minimizing motor mimicry by myself: self-focus enhances online action-control mechanisms during motor contagion. *Consciousness and cognition*, *19*, 98-106.
- Wang, Y., & Hamilton, A. (2013). Understanding the role of the 'self' in the social priming of mimicry. *PloS one*, *8*, e60249.
- Wang, Y., & Hamilton, A. F. d. C. (2015). Anterior medial prefrontal cortex implements social priming of mimicry. *Social Cognitive and Affective Neuroscience*, *10*, 486-493.
